# Supplementary material for: Chemoprevention of Lung Cancer with a Combination of Mitochondria-Targeted Compounds
Source: MDPI journal article supplement (doi:10.3390/cancers14102538), 2022-05-21
Supplement: s1 [file s1]

# Chemoprevention of Lung Cancer with a Combination of Mitochondria-Targeted Compounds

Qi Zhang, Donghai Xiong, Jing Pan, Yian Wang, Micael Hardy, Balaraman Kalyanaraman and Ming You

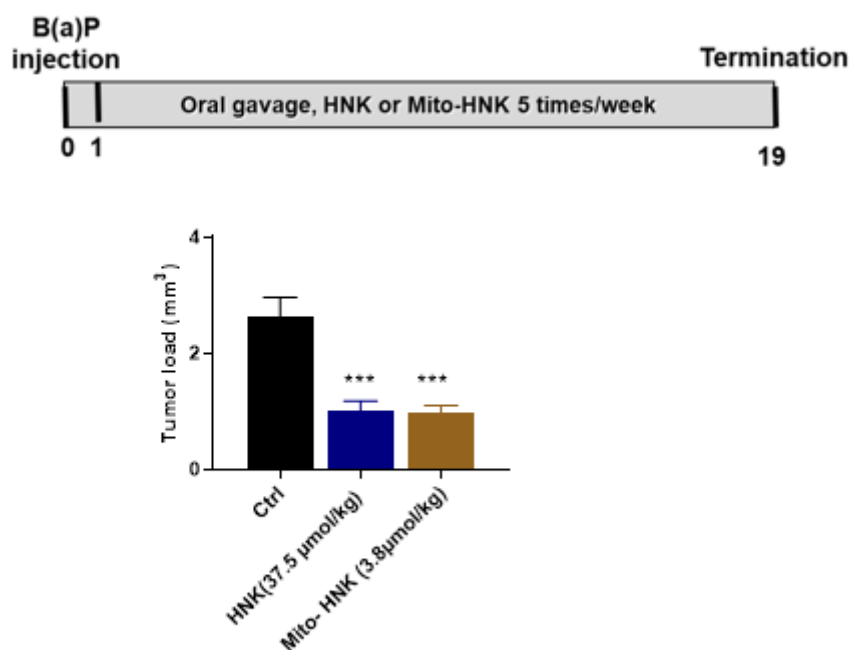

**Figure S1.** Efficacy of HNK and Mito-HNK in the B[a]P-induced lung cancer model. Upper panel: experimental design; Lower pane: Efficacy on tumor load. \*\*\* $p < 0.001$ .
